# Supplementary material for: Evidence for thermosensitivity of the cotton (Gossypium hirsutum L.) immature fiber (im) mutant via hypersensitive stomatal activity
Source: PLoS One. 2021 Dec 13;16(12):e0259562. doi: 10.1371/journal.pone.0259562 (PMC8668099; doi:10.1371/journal.pone.0259562)
Supplement: S5 Table — (XLSX) [file pone.0259562.s009.xlsx]

## Sheet: Commonly up-regulated
S5 Table. GO analysis of commonly up-regulated genes in leaf and fiber tissues of im mutant.
GO:0009266: response to temperature stimulus; p, 9.6e-05
No.	GENE_GhHAU	TAIR best hit	Descriptions
1	Ghir_A12G016320	AT1G24620	EF hand calcium-binding protein family
2	Ghir_A12G021090	AT4G25200	mitochondrion-localized small heat shock protein 23.6
3	Ghir_A10G021670	AT5G04530	3-ketoacyl-CoA synthase 19
4	Ghir_D11G001970	AT5G42020	Heat shock protein 70 (Hsp 70) family protein
5	Ghir_D04G007320	AT3G55990	Eskimo 1 (ESK1) or TBL 29 as a negative regulator of cold acclimation.
6	Ghir_D08G017640	AT1G53540	HSP20-like chaperones superfamily protein

## Sheet: Commonly down-regulated
S5 Table. GO analysis of commonly down-regulated genes in leaf and fiber tissues of im mutant.
GO:0006950: response to stress (p, 0.00077)
No.	GENE_GhHAU	TAIR 10 best hit	Descriptions
1	Ghir_A11G001400	AT4G23810	WRKY family transcription factor
2	Ghir_D13G013220	AT4G09460	myb domain protein 6
3	Ghir_D09G015430	AT2G37130	Peroxidase superfamily protein
4	Ghir_D08G001710	AT5G19875	Hypothetical protein
5	Ghir_A09G018370	AT1G73680	alpha dioxygenase
6	Ghir_D11G005700	AT4G33950	Protein kinase superfamily protein
7	Ghir_D01G005430	AT3G15210	ethylene responsive element binding factor 4
8	Ghir_D05G020770	AT1G45249	abscisic acid responsive elements-binding factor 2
9	Ghir_A10G016830	AT4G02380	senescence-associated gene 21
10	Ghir_D06G016500	AT3G20600	Late embryogenesis abundant (LEA) hydroxyproline-rich glycoprotein family
11	Ghir_A09G014510	AT1G52340	NAD(P)-binding Rossmann-fold superfamily protein
12	Ghir_D05G034520	AT4G27190	NB-ARC domain-containing disease resistance protein
13	Ghir_A07G000960	AT5G56550	oxidative stress 3
14	Ghir_A10G023720	AT2G40000	ortholog of sugar beet HS1 PRO-1 2
15	Ghir_D06G005400	AT3G12500	basic chitinase
16	Ghir_D06G002770	AT3G14460	LRR and NB-ARC domains-containing disease resistance protein
17	Ghir_A10G008850	AT4G37530	Peroxidase superfamily protein
GO:0009505: plant-type cell wall (p, 0.00016)
No.	GENE_GhHAU	TAIR best hit	Descriptions
1	Ghir_D05G022870	AT5G64260	EXORDIUM like 2
2	Ghir_A07G014520	AT1G01300	Eukaryotic aspartyl protease family protein
3	Ghir_D07G001870	AT5G20860	Plant invertase/pectin methylesterase inhibitor superfamily
4	Ghir_A08G017820	AT4G16563	Eukaryotic aspartyl protease family protein
5	Ghir_A06G010950	AT5G10840	Endomembrane protein 70 protein family
6	Ghir_A09G012420	AT1G28110	serine carboxypeptidase-like 45
